# Supplementary material for: Transgenic expression of a functional fragment of harpin protein Hpa1 in wheat induces the phloem-based defence against English grain aphid
Source: PubMed Central journal article supplement (PMC3967084; doi:10.1093/jxb/ert488), 2014-03-25
Supplement: supp_ert488_jexbot103762_file001.pdf [file supp_ert488_jexbot103762_file001.pdf]

## Supplementary Data

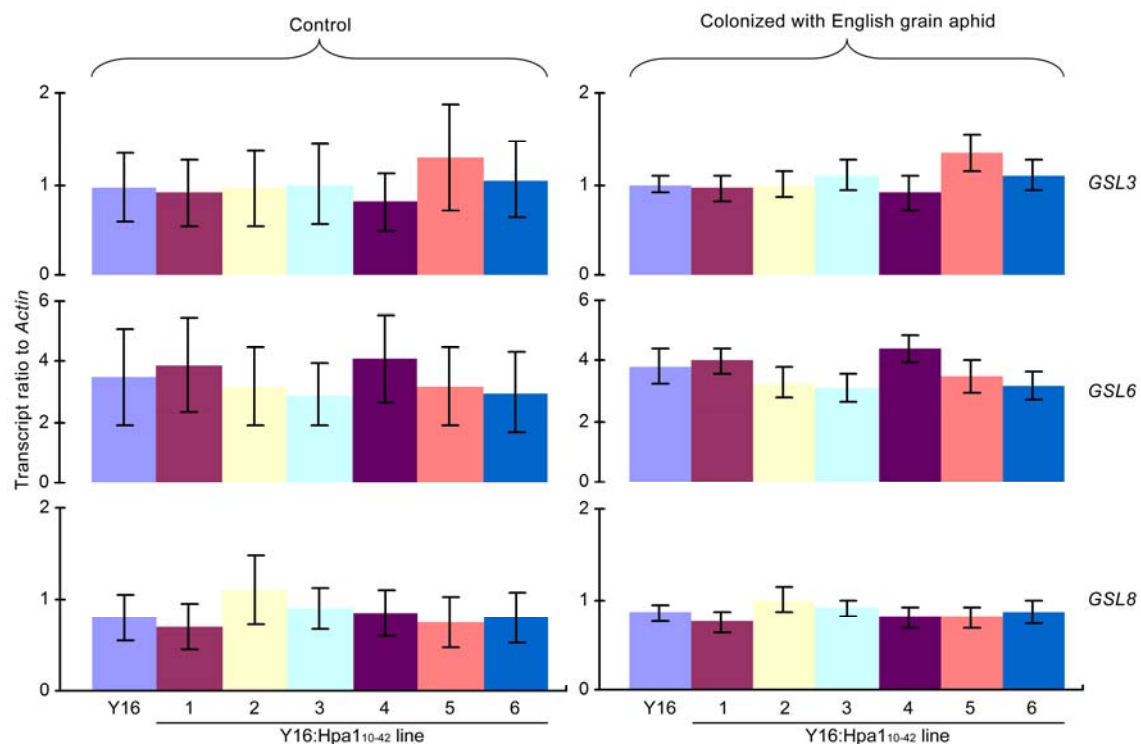

**Fig. S1.** The expression of *GSL3*, *GSL6*, and *GSL8* in leaves of Y16 and Y16:Hpa1<sub>10-42</sub> plants. Plants were colonized with English grain aphid or not colonized in control and gene expression was analyzed six hours later. Data shown are mean values  $\pm$  SD bars of results from three experimental repeats (15 plants/repeat).

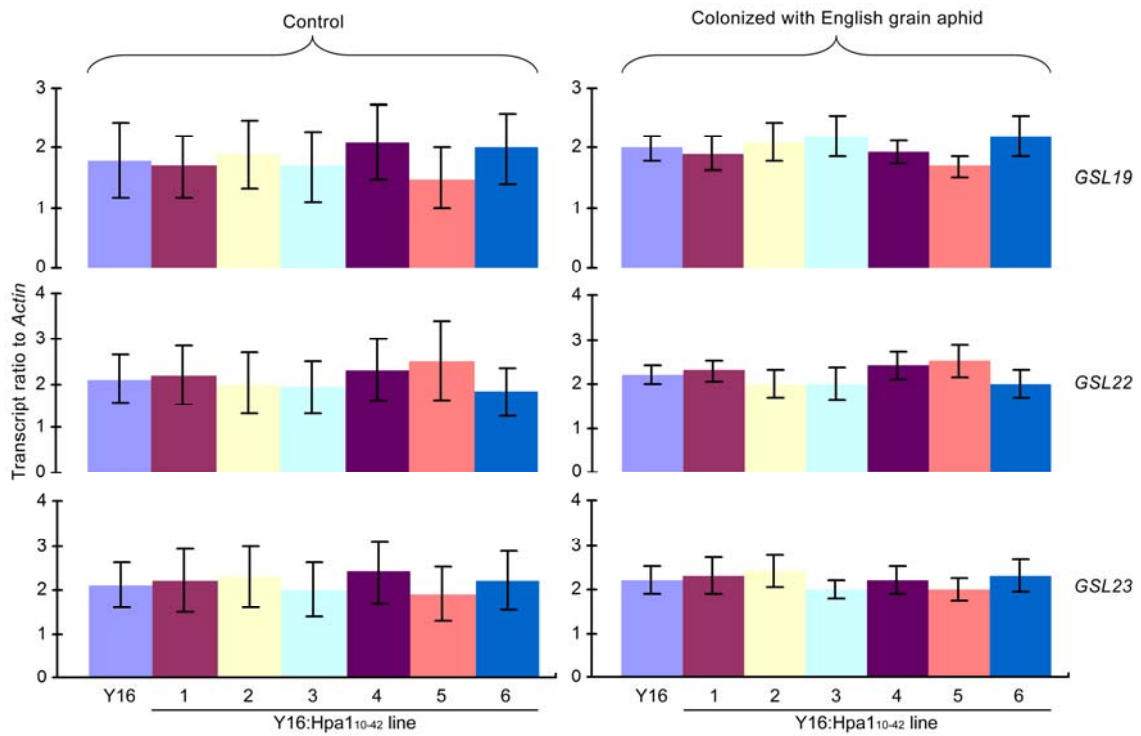

**Fig. S2.** The expression of *GSL19*, *GSL22*, and *GSL23* in leaves of Y16 and Y16:Hpa1<sub>10-42</sub> plants. Plants were colonized with English grain aphid or not colonized in control and gene expression was analyzed six hours later. Data shown are mean values  $\pm$  SD bars of results from three experimental repeats (15 plants/repeat).

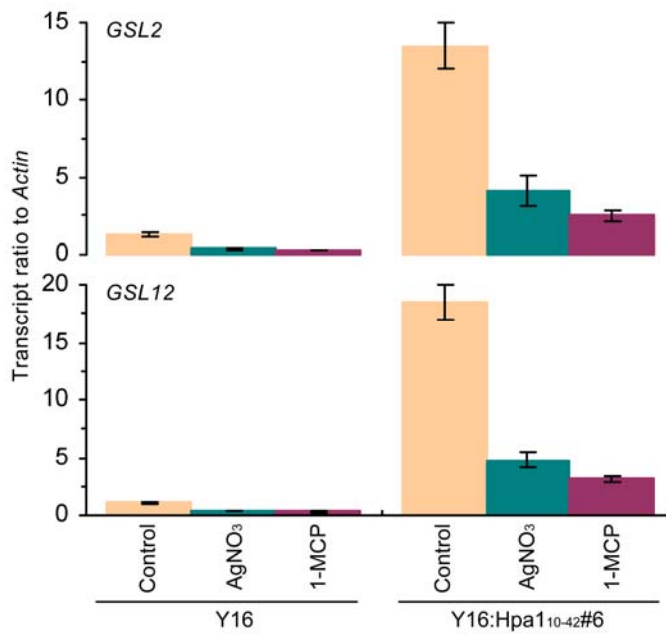

**Fig. S3.** The effects of ethylene signaling inhibitors on the expression of *GSL2* and *GSL12* genes. Plants were colonized with aphids and simultaneously treated with water (control), AgNO<sub>3</sub>, or 1-MCP. Six hours later, gene expression was analyzed. Data shown are mean values  $\pm$  SD bars of results from three experimental repeats (10 plants/repeat).

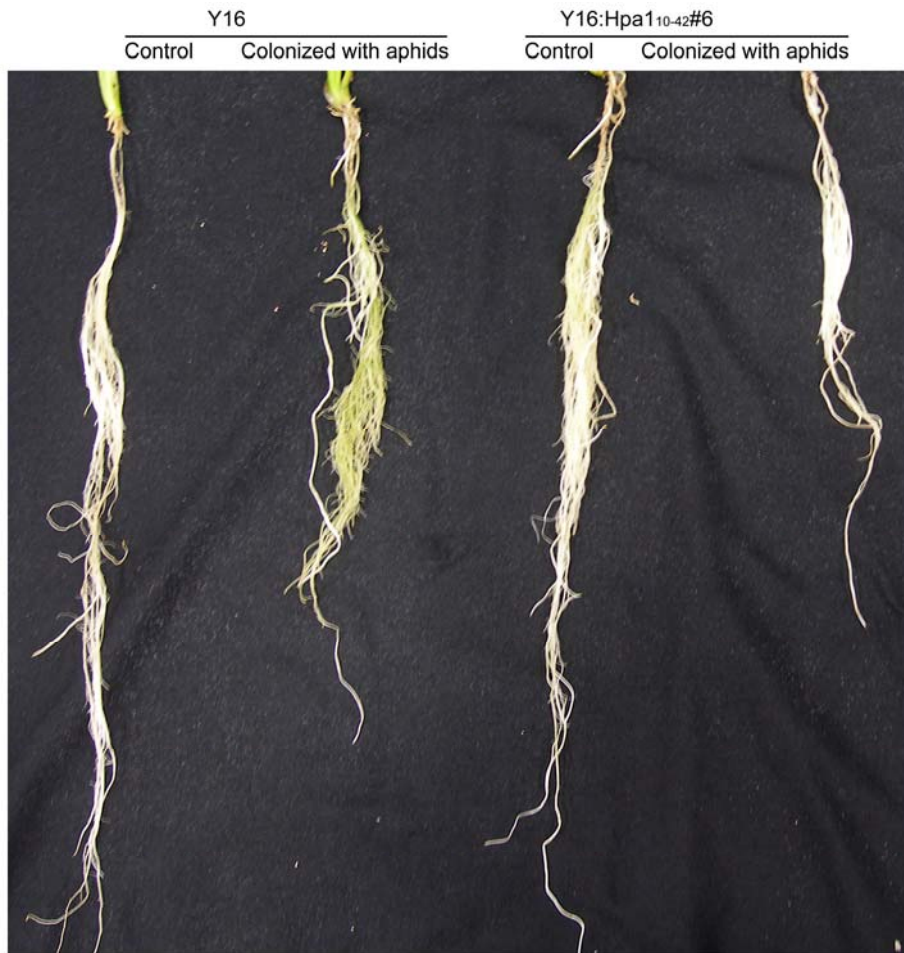

**Fig. S4.** The effects of leaf colonization with aphids on the root growth of Y16 and Y16:Hpa1<sub>10-42</sub> plants. Plants were cultured in the Hogland nutrition liquid and kept from aphid infestations in the experimental control group. In the aphid colonization group, the upper sides of the top two expanded leaves of 15-day-old plants were colonized with uniform 10-day-old aphids (5 aphids/leaf). Twenty days later, roots were excised and photographed. Each root photo represents 15 plants.

**Table S1.** Information on genes analyzed and primers used in this study

| Gene                        | GenBank accession number | Primers                                                          | Region in the gene sequence | RT-PCR product size (bp) |
|-----------------------------|--------------------------|------------------------------------------------------------------|-----------------------------|--------------------------|
| <i>Actin1</i>               | CA483746                 | 5'-GGCCGGAGGCCGAGGGGG-3',<br>5'-CGGTGGCTTTGCCACAAA-3'            | 1–213                       | 213                      |
| <i>Hpa1<sub>10-42</sub></i> | AY875714                 | 5'-ATGGGCAGCGCGTCCAACCTTC-3',<br>5'-TCAGTGGTGGTGGTGGTGGTGCA-3'   | 33–126                      | 99                       |
| * <i>PP2-A1</i>             | NM_118104                | 5'-CACTTCGACCTCCTAGGCCG-3',<br>5'-CTCATAACATTGAGAAAGTGAT-3'      | 514–739                     | 199                      |
| * <i>PP2-A2</i>             | NM_001160782             | 5'-GTCCAGCTGCTACTGAAAAGGA-3',<br>5'-CTTTGCAACCTCTGATCTTAC-3'     | 108–312                     | 205                      |
| <i>GSL2</i>                 | DQ0864383                | 5'-CTGGGAGTGCTGGTGCTGAT-3',<br>5'-TAACAATCACTCCAAGCAGTATCTC-3'   | 136–343                     | 208                      |
| <i>GSL3</i>                 | DQ086484                 | 5'-ATTGCCCAAGCGATCAAGCCTGTC-3',<br>5'-TCTGCTGAACGCCTGGTTGAAAA-3' | 246–428                     | 183                      |
| <i>GSL6</i>                 | AM743080                 | 5'-ACGGCGAGACCGACGAAA-3',<br>5'-GCCAGGAGAAACCGAACCAG-3'          | 230–451                     | 222                      |
| <i>GSL8</i>                 | DQ086485                 | 5'-TCTATGTGACTACTGTTGGGTT-3',<br>5'-CACGCTCAATGCTTTATTT-3'       | 121–275                     | 155                      |
| <i>GSL10</i>                | DQ086486                 | 5'-GGGGACAGAGCGAGAACA-3',<br>5'-GTAGGCAACACGAAGAGC-3'            | 3–195                       | 193                      |
| <i>GSL12</i>                | DQ086487                 | 5'-GTTCTTCTCGTGGTTCCCCTTT-3',<br>5'-GTCCCTAATCAAGTCCAGAAATGTA-3' | 205–386                     | 182                      |
| <i>GSL19</i>                | DQ086488                 | 5'-TCATCCCAACTGTCTGGTTTATT-3',<br>5'-TATCTACGGAGCACAGCCCCACT-3'  | 282–453                     | 171                      |
| <i>GSL22</i>                | DQ086488                 | 5'-ATCGTTCTGGGAGTGCTGGTGCT-3',<br>5'-CCACAGAAATAACACTGCCCCAC-3'  | 130–307                     | 178                      |
| <i>GSL23</i>                | DQ086490                 | 5'-AACCTCCGCCTTCCGACAGA-3',<br>5'-GCATACAGGAACACTCGGAATC-3'      | 31–222                      | 192                      |

\*Primers for both genes were designed according to the conserved region in the corresponding gene orthologs identified in different plant species (Dinant *et al.*, 2003) and synthesized against the conserved regions in the *Arabidopsis* orthologs. The primers were used in this study after RT-PCR products obtained from amplifying wheat RNA had been confirmed to be more than 87% identity with the conserved regions of previously reported gene orthologs of different plant species (Dinant *et al.*, 2003; NCBI nucleic acid databases and BLAST searches).

**Table S2.** Characters of seeds from plants that were not colonized with aphids

| Wheat genotype               | Long/short axis ratio | Long axis (mm) | Short axis (mm) | Roundness | Equivalent cycle diameter (mm) | Size (mm <sup>2</sup> ) | Circumference (mm) | Weight (g) |
|------------------------------|-----------------------|----------------|-----------------|-----------|--------------------------------|-------------------------|--------------------|------------|
| Y16                          | 2.15                  | 4.61           | 2.21            | 1.27      | 3.14                           | 7.84                    | 11.57              | 0.050      |
| Y16:Hpa1 <sub>10-42</sub> #6 | 2.13                  | 4.58           | 2.20            | 1.26      | 3.11                           | 7.80                    | 11.55              | 0.049      |
